# Supplementary material for: Color regulation for Eu(tta)3phen/E7 composites by interaction between Eu(iii) complexes and liquid crystals
Source: Royal Society of Chemistry journal article supplement (doi:10.1039/d2tc00046f), 2022-01-01
Supplement: d2tc00046f2.pdf [file d2tc00046f2.pdf]

## Supporting Information

### Color regulation for Eu(tta)<sub>3</sub>phen/E7 composites by interaction between Eu(III) complexes and liquid crystals

Xu Sang,<sup>a,b</sup> Qingru Wang,<sup>c</sup> Xiaoli Gao,<sup>d</sup> Adnan Khan,<sup>a,b</sup> Ziyu Chen,<sup>a,b</sup> Jiaxin

Yang,<sup>a,b</sup> Ming Feng,<sup>a,b</sup> Lisa Liu,<sup>a,b</sup> Feng Song<sup>\*a,b</sup> and Wei Huang<sup>\*a,c</sup>

<sup>a</sup>. School of Physics & The Key Laboratory of Weak Light Nonlinear Photonics, Ministry of Education, Nankai University, Tianjin 300071, China.

<sup>b</sup>. Collaborative Innovation Center of Extreme Optics, Shanxi University, Taiyuan 030006, China.

<sup>c</sup>. School of Physical Science and Information Technology, Shandong Provincial Key Laboratory of Optical Communication Science and Technology, Liaocheng University, Liaocheng 252059, China.

<sup>d</sup>. School of Chemistry and Chemical Engineering, Huazhong University of Science and Technology, Wuhan 430074, China.

<sup>e</sup>. Key Laboratory of Flexible Electronics (KLOFE) & Institute of Advanced Materials (IAM), Jiangsu National Synergetic Innovation Center for Advanced Materials (SICAM), Nanjing Tech University, Nanjing 211816, China.

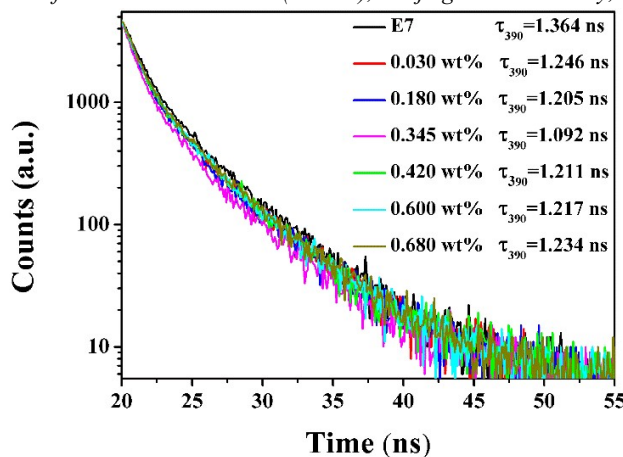

Fig. S1. Decay curves for the luminescence of the pure E7 and Eu(tta)<sub>3</sub>phen doped E7 with different concentrations (monitored at 390 nm), both the samples obey the double-exponential function.

The changes of E7 lifetimes after the presence of Eu(tta)<sub>3</sub>phen complexes indicate that Förster-type energy transfer exists between them. The efficiency of Förster-type energy transfer ( $\eta_F$ ) can be obtained according to equation:<sup>1</sup>

$$\eta_F = 1 - \frac{\tau_S}{\tau_{S0}}. \quad (1)$$

Where  $\tau_{S0}$  is the lifetime values of E7 in the absence of Eu(tta)<sub>3</sub>phen,  $\tau_S$  is the lifetime values of E7 in the presence of Eu(tta)<sub>3</sub>phen. The results are shown in Fig. S2 (a). Since  $\eta_F$  is always less than the total energy transfer efficiency,

the radiative reabsorption energy transfer mechanism is also accompanied by the process of energy transfer. The efficiency of the radiative reabsorption energy transfer ( $\eta_R$ ) can be obtained according to equation:<sup>1</sup>

$$\eta_R = \eta - \eta_F \quad (2)$$

Where  $\eta$  is the total energy transfer efficiency.

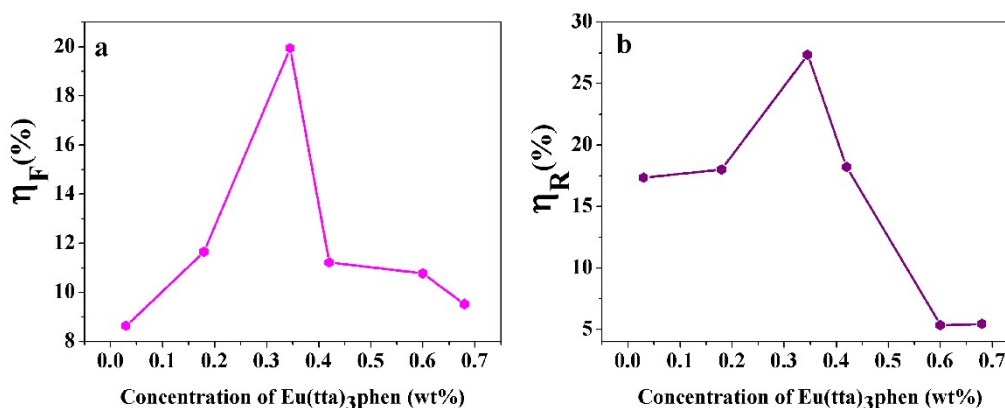

Fig. S2. (a) Efficiency of Förster-type energy transfer for Eu(tta)<sub>3</sub>phen/E7 composites with different concentrations, (b) efficiency of radiative reabsorption energy transfer for Eu(tta)<sub>3</sub>phen/E7 composites with different concentrations.

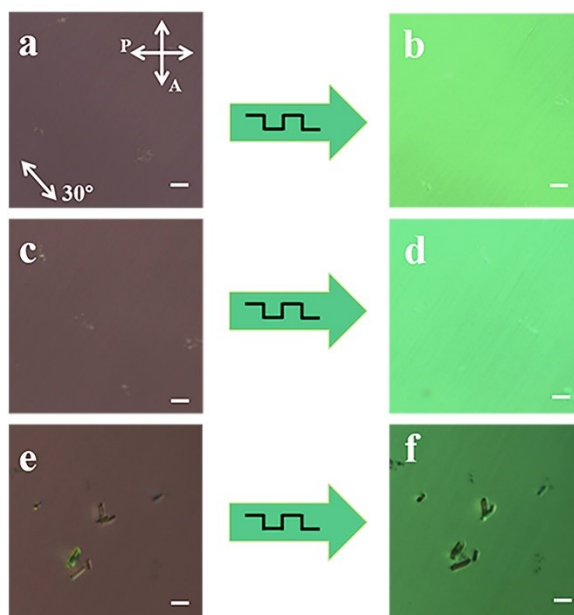

Fig. S3. POM images of the E7 (a, b) and Eu(tta)<sub>3</sub>phen/E7 composites (c, d, e, f) in LC cells, crossed polarizers, 20 $\times$ . The concentration is 0.345 (c and d) and 0.680 wt% (e and f), respectively. The square wave voltage was applied across the LC cells (b, d, f) or not (a, c, e). The angle between the aligning layer direction and the polarization direction was about 30 $^\circ$ . A, analyzer; P, polarizer. The scale bar is 20  $\mu$ m.

\* Corresponding authors: Feng Song, [fsong@nankai.edu.cn](mailto:fsong@nankai.edu.cn); Wei Huang, [iamwhuang@njtech.edu.cn](mailto:iamwhuang@njtech.edu.cn)

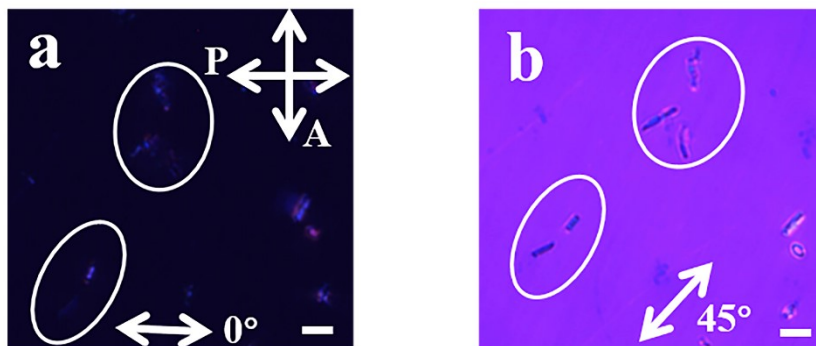

Fig. S4. POM images of the  $\text{Eu}(\text{tta})_3\text{phen}/\text{E7}$  composites, crossed polarizers, 20 $\times$ . The angle between the aligning layer direction and the polarization direction was 0 $^\circ$  (a) and 45 $^\circ$  (b), respectively. The concentration is 0.680 wt%. A, analyzer; P, polarizer. The scale bar is 20  $\mu\text{m}$ .

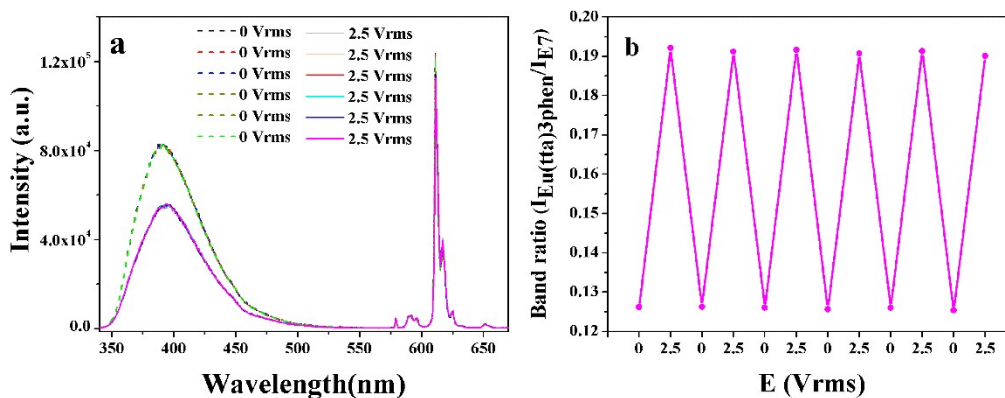

Fig. S5. (a) Emission spectra of  $\text{Eu}(\text{tta})_3\text{phen}/\text{E7}$  composites, measured cyclically under the condition of open circuit (dashed line) and applying a voltage of 2.5 Vrms (solid line),  $\lambda_{\text{ex}}=337$  nm, (b) changes in the ratio of integral intensity of  $\text{Eu}(\text{tta})_3\text{phen}$  to E7 under the condition of open circuit and applying a voltage of 2.5 Vrms.

## References

1. C. J. Li, X. F. Liu and J. R. Qiu, *Physical Chemistry Chemical Physics*, 2018, **20**, 26513.
